# Supplementary material for: Type 1 conventional dendritic cells and interferons are required for spontaneous CD4+ and CD8+ T‐cell protective responses to breast cancer
Source: PubMed Central journal article supplement — Clin Transl Immunology. 2021 Jul 14;10(7):e1305. doi: 10.1002/cti2.1305 (PMC8279130; doi:10.1002/cti2.1305), 2021-07-14
Supplement: CTI2-10-e1305-s001.pdf [file CTI2-10-e1305-s001.pdf]

## Supplementary Tables and Figures

### Type 1 conventional dendritic cells and interferons are required for spontaneous CD4<sup>+</sup> and CD8<sup>+</sup> T cell protective responses to breast cancer

Raphaël Mattiuz, Carine Brousse, Marc Ambrosini, Jean-Charles Cancel, Gilles Bessou, Julie Mussard, Amélien Sanlaville, Christophe Caux, Nathalie Bendriss-Vermare, Jenny Valladeau-Guilemond, Marc Dalod, Karine Crozat

**Supplementary table 1.** Mouse strains used in this study

| Type   | Mouse strains <sup>1</sup>                              | Official nomenclatures                                               | References <sup>2</sup> | Source                                                                             |
|--------|---------------------------------------------------------|----------------------------------------------------------------------|-------------------------|------------------------------------------------------------------------------------|
| KI     | <i>Karma-tmt-hDTR</i>                                   | <i>Gpr141b<sup>tm1(HBEGF)Ciphe</sup></i>                             | 1                       | Dalod lab/Ciphe                                                                    |
|        | <i>Tg<sup>TeraTcrb1100Mjb</sup>, Rag2<sup>-/-</sup></i> | C57BL/6-Tg(TeraTcrb)1100Mjb/J;<br>B6(Cg)-Rag2 <sup>tm1.1Cgn</sup> /J | 2, 3                    | CIML: Dr. A.M. Schmidt-Verhulst<br>Jackson Laboratory<br>(Stock n° 003831; 008449) |
|        | <i>Ubc-GFP<sup>+/+</sup></i>                            | C57BL/6-Tg(UBC-GFP)30Scha/J                                          | 4                       | CIML: Dr. M. Bajénoff<br>Jackson Laboratory<br>(Stock n° 004353)                   |
| KO     | <i>Ccr7<sup>-/-</sup></i>                               | B6.129P2(C)- <i>Ccr7<sup>tm1Rfor</sup></i> /J                        | 5                       | CIML: Dr. H. Lelouard<br>Jackson Laboratory<br>(Stock n° 006621)                   |
|        | <i>Cxcl9<sup>-/-</sup></i>                              | B6- <i>Cxcl9<sup>tm2Ciphe</sup></i>                                  | This paper              | Dalod lab/Ciphe                                                                    |
|        | <i>Ifnar1<sup>-/-</sup></i>                             | B6.129S2- <i>Ifnar1<sup>tm1Agt</sup></i>                             | 6, 7                    | Pr. U. Kalinke                                                                     |
|        | <i>Ifngr1<sup>-/-</sup></i>                             | B6.129S7- <i>Ifngr1<sup>tm1Agt</sup></i> /J                          | 8                       | CIML: Dr. H. Lelouard<br>Jackson Laboratory<br>(Stock n° 003288)                   |
|        | <i>Il12b<sup>-/-</sup></i>                              | B6.129S1- <i>Il12b<sup>tm1Jm</sup></i> /J                            | 9                       | CIML: Dr. H. Lelouard<br>Jackson Laboratory<br>(Stock n° 002693)                   |
|        | <i>Il15ra<sup>-/-</sup></i>                             | B6;129X1- <i>Il15ra<sup>tm1Ama</sup></i> /J                          | 10                      | Jackson Laboratory<br>(Stock n° 003723)                                            |
|        | <i>Stat1<sup>-/-</sup></i>                              | B6- <i>Stat1<sup>tm1d(EUCOMM)Ciphe</sup></i>                         | 11                      | EUCOMM/<br>Dalod lab/Ciphe                                                         |
|        | <i>Xcr1<sup>-/-</sup></i>                               | B6.129P2- <i>Xcr1<sup>tm1Dgen</sup></i> /J                           | 12, 13                  | Jackson Laboratory<br>(Stock n° 005791)                                            |
| Cre    | <i>Karma<sup>Cre</sup></i>                              | B6- <i>Gpr141b<sup>tm2Ciphe</sup></i>                                | 14                      | Dalod lab/Ciphe                                                                    |
|        | <i>Xcr1<sup>Cre</sup></i>                               | B6- <i>Xcr1<sup>tm1Ciphe</sup></i>                                   | 14                      | Dalod lab/Ciphe                                                                    |
| Floxed | <i>Cxcl9<sup>fl</sup></i>                               | B6- <i>Cxcl9<sup>tm1Ciphe</sup></i>                                  | This paper              | Dalod lab/Ciphe                                                                    |
|        | <i>Ifnar1<sup>fl</sup></i>                              | <i>Ifnar1<sup>tm1Uka</sup></i>                                       | 15, 16                  | Pr. U. Kalinke                                                                     |
|        | <i>Il15ra<sup>fl</sup></i>                              | C57BL/6- <i>Il15ra<sup>tm2.1Ama</sup></i> /J                         | 17                      | Jackson Laboratory<br>(Stock n° 022365)                                            |
|        | <i>Rosa26<sup>lox-stop-lox-DTA</sup></i>                | B6.129P2- <i>Gt(ROSA)26Sor<sup>tm1(DTA)Lky</sup></i> /J              | 18                      | Prs. D. Voehringer & R.M.<br>Locksley<br>Jackson Laboratory<br>(Stock n° 009669)   |
|        | <i>Rosa26<sup>lox-stop-lox-hDTR</sup></i>               | <i>Gt(ROSA)26Sor<sup>tm1(HBEGF)Awai</sup></i> /J                     | 19                      | CIML: Dr. M. Sieweke<br>Jackson Laboratory<br>(Stock n° 007900)                    |
|        | <i>Rosa26<sup>lox-stop-lox-tDRFP</sup></i>              | <i>Gt(ROSA)26Sor<sup>tm1Hjf</sup></i>                                | 20                      | CIML: Dr. H. Luche                                                                 |

<sup>1</sup>All mice were maintained in a C57BL/6J background.

<sup>2</sup>References, see at the end of this supplementary file.

**Supplementary table 2. Antibodies used in this study**

| Antibody                                            | Clone               | Conjugates  | Company                 | Dilution/Dose | Use                      |
|-----------------------------------------------------|---------------------|-------------|-------------------------|---------------|--------------------------|
| <b>Arm Hamster</b>                                  | Polyclonal          | A594        | Jackson ImmunoResearch  | 1/200         | Microscopy               |
| <b>CD3<math>\epsilon</math></b>                     | 145-2C11            | BV510       | BD Biosciences          | 1/200         | Flow cytometry           |
| <b>CD3<math>\epsilon</math></b>                     | 145-2C11            | Purified    | BD Biosciences          | 1/300         | Flow cytometry           |
| <b>CD4</b>                                          | GK1.5               | Purified    | BioXCell                | 500 $\mu$ g   | <i>In vivo</i> depletion |
| <b>CD4</b>                                          | GK1.5               | APC-H7      | BD Biosciences          | 1/200         | Flow cytometry           |
| <b>CD4</b>                                          | RM4-5               | ef450       | ThermoFisher Scientific | 1/100         | Microscopy               |
| <b>CD8<math>\alpha</math></b>                       | 53-6.7              | PerCP-Cy5.5 | BD Biosciences          | 1/200         | Flow cytometry           |
| <b>CD8<math>\beta</math></b>                        | H35-17.2            | Purified    | produced in house       | 150 $\mu$ g   | <i>In vivo</i> depletion |
| <b>CD11b</b>                                        | M1/70               | BUV395      | BD Biosciences          | 1/400         | Flow cytometry           |
| <b>CD11c</b>                                        | N418                | BV785       | BioLegend               | 1/200         | Flow cytometry           |
| <b>CD19</b>                                         | 1D3                 | BV510       | BD Biosciences          | 1/200         | Flow cytometry           |
| <b>CD19</b>                                         | 1D3                 | Alexa700    | BD Biosciences          | 1/200         | Flow cytometry           |
| <b>CD24</b>                                         | M1/69               | eFluor450   | eBioscience             | 1/1000        | Flow cytometry           |
| <b>CD25</b>                                         | PC61                | BV421       | BD Biosciences          | 1/600         | Flow cytometry           |
| <b>CD40</b>                                         | 3/23                | PE          | BD Biosciences          | 1/200         | Flow cytometry           |
| <b>CD43</b>                                         | 1B11 <sup>1</sup>   | PE-Cy5      | BioLegend               | 1/200         | Flow cytometry           |
| <b>CD44</b>                                         | IM7                 | PE-Cy7      | eBioscience             | 1/800         | Flow cytometry           |
| <b>CD45.2</b>                                       | 104                 | V500        | BD Biosciences          | 1/200         | Flow cytometry           |
| <b>CD45.2</b>                                       | 104                 | BUV737      | BD Biosciences          | 1/400         | Flow cytometry           |
| <b>CD62l</b>                                        | MEL-14              | BV421       | BD Biosciences          | 1/400         | Flow cytometry           |
| <b>CD64</b>                                         | X54-5/7.1           | BV711       | BioLegend               | 1/200         | Flow cytometry           |
| <b>CD69</b>                                         | H1.2F3              | FITC        | eBioscience             | 1/200         | Flow cytometry           |
| <b>CD80</b>                                         | 16-10A1             | APC         | BD Biosciences          | 1/200         | Flow cytometry           |
| <b>CD86</b>                                         | GL1                 | PE-Cy7      | BD Biosciences          | 1/400         | Flow cytometry           |
| <b>CD117</b>                                        | 2B8                 | PE-Cy7      | BD Biosciences          | 1/200         | Flow cytometry           |
| <b>CD172a</b>                                       | P84                 | FITC        | BD Biosciences          | 1/200         | Flow cytometry           |
| <b>CCR7</b>                                         | 4B12                | Biotin      | eBioscience             | 1/100         | Flow cytometry           |
| <b>CCR7</b>                                         | 4B12                | PE          | BD Biosciences          | 1/100         | Flow cytometry           |
| <b>CTLA-4</b>                                       | 9D9                 | Purified    | BioXCell                | 200 $\mu$ g   | <i>In vivo</i> depletion |
| <b>F4/80</b>                                        | BM8                 | BV605       | BioLegend               | 1/200         | Flow cytometry           |
| <b>Fc<math>\epsilon</math>RI<math>\alpha</math></b> | MAR-1               | PacificBlue | BioLegend               | 1/200         | Flow cytometry           |
| <b>FoxP3</b>                                        | FJK-16s             | Biotin      | eBioscience             | 1/100         | Flow cytometry           |
| <b>GFP</b>                                          | Polyclonal (Rabbit) | A488        | Invitrogen              | 1/1000        | Microscopy               |
| <b>GzmB</b>                                         | GB11                | APC         | Invitrogen              | 1/100         | Flow cytometry           |
| <b>HER2</b>                                         | 7.16.4              | Purified    | BioXCell                | 1/1000        | Microscopy               |
| <b>IFN<math>\gamma</math></b>                       | XMG1.2              | Alexa700    | BD Biosciences          | 1/200         | Flow cytometry           |
| <b>Ki67</b>                                         | B56                 | V450        | BD Biosciences          | 1/100         | Flow cytometry           |
| <b>LAG3</b>                                         | C9B7W               | BV711       | BD Biosciences          | 1/200         | Flow cytometry           |
| <b>Ly-6C</b>                                        | AL-21               | APC-Cy7     | BD Biosciences          | 1/1000        | Flow cytometry           |
| <b>MHC-II</b>                                       | M5/114.15.2         | Alexa700    | BioLegend               | 1/400         | Flow cytometry           |
| <b>NK1.1</b>                                        | PK136               | Purified    | produced in house       | 200 $\mu$ g   | <i>In vivo</i> depletion |
| <b>NK1.1</b>                                        | PK136               | BV650       | BioLegend               | 1/400         | Flow cytometry           |
| <b>NKp46</b>                                        | 29A1.4              | BV510       | BD Biosciences          | 1/200         | Flow cytometry           |
| <b>PD-1</b>                                         | 29F.1A12            | BV785       | BioLegend               | 1/400         | Flow cytometry           |
| <b>Rabbit</b>                                       | Polyclonal (Donkey) | A647        | Molecular Probes        | 1/500         | Microscopy               |
| <b>RFP</b>                                          | Polyclonal (Rabbit) | Purified    | Rockland                | 1/500         | Microscopy               |
| <b>Siglec-H</b>                                     | 551                 | PerCP-Cy5.5 | BioLegend               | 1/200         | Flow cytometry           |
| <b>TCR<math>\beta</math></b>                        | H57-597             | FITC        | BD Biosciences          | 1/200         | Flow cytometry           |
| <b>Tim-3</b>                                        | RMT3-23             | BV605       | BioLegend               | 1/200         | Flow cytometry           |
| <b>TNF<math>\alpha</math></b>                       | MP6-XT22            | BV785       | BioLegend               | 1/200         | Flow cytometry           |
| <b>XCR1</b>                                         | ZET                 | BV650       | BioLegend               | 1/1000        | Flow cytometry           |

<sup>1</sup>The 1B11 clone of anti-CD43 mAb recognizes the glycosylated isoform of the molecule that is specifically expressed on effector T cells, in particular effector CD8<sup>+</sup> T cells endowed with cytotoxic activity<sup>21</sup>.

**Supplementary table 3.** Primers used in this study for qRT-PCR

|              | Forward primers               | Reverse primers                     |
|--------------|-------------------------------|-------------------------------------|
| <i>Hprt</i>  | 5'-GGCCCTCTGTGTGCTCAAG-3'     | 5'-CTGATAAAATCTACAGTCATAGGAATGGA-3' |
| <i>Ifna2</i> | 5'-AGGACAGGCAGGACTTTGGA-3'    | 5'-GCCTTCTGGATCTGCTGGTTA-3'         |
| <i>Ifna4</i> | 5'-AAGGACAGGAAGGATTTTGGATT-3' | 5'-GAGCCTTCTGGATCTGTTGGTT-3'        |
| <i>Ifnb</i>  | 5'-GGTGGTCCGAGCAGATCTT-3'     | 5'-CAGTTTTGGAAGTTTCTGGTAAGTCTT-3'   |
| <i>Ifng</i>  | 5'-CAACAGCAAGGCGAAAAAGG-3'    | 5'-CCTGTGGGTTGTTGACCTCAA-3'         |
| <i>Irf7</i>  | 5'-TCCAGTTGATCCGCATAAGGT-3'   | 5'-CTTCCCTATTTTCCGTGGCTG-3'         |
| <i>Isg15</i> | 5'-GGTGTCCGTGACTAACTCCAT-3'   | 5'-TGGAAAGGGTAAGACCGTCCT-3'         |
| <i>Mx1</i>   | 5'-GACCATAGGGGTCTTGACCAA-3'   | 5'-AGACTTGCTCTTTCTGAAAAGCC-3'       |
| <i>Oas3</i>  | 5'-TCTGGGGTTCGCTAAACATCAC-3'  | 5'-GATGACGAGTTCGACATCGGT-3'         |

**Supplementary Figure 1**

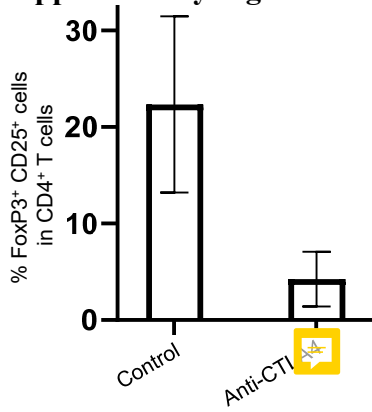

**Supplementary Figure 1.** Efficacy of the depletion of regulatory CD4<sup>+</sup> T cells in NOP23 tumors.

Mice were administered anti-CTLA-4 mAb (clone 9D9, 200 μg per injection) 1d before NOP23 cell engraftment, then every three days. Mice were euthanized at day 7 and tumors were harvested for analysis of their content in regulatory CD4<sup>+</sup> T cells by flow cytometry, defined as the percent of Foxp3<sup>+</sup> CD25<sup>+</sup> cells within singlet, non-autofluorescent CD45.2<sup>+</sup> CD19<sup>-</sup> TCRβ<sup>+</sup> CD8α<sup>-</sup> CD4<sup>+</sup> T lymphocytes.

Data are shown as mean±SEM. n=3 for anti-CTLA-4-treated mice, n=2 for control mice.

**Supplementary Figure 2**

**a TdLN**

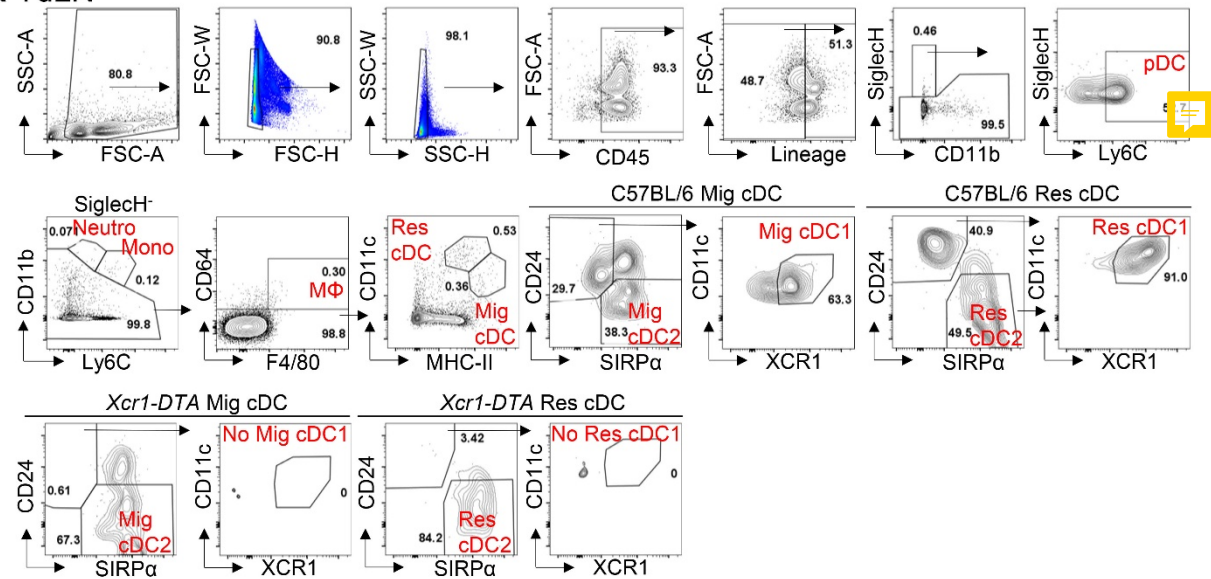

**b TdLN**

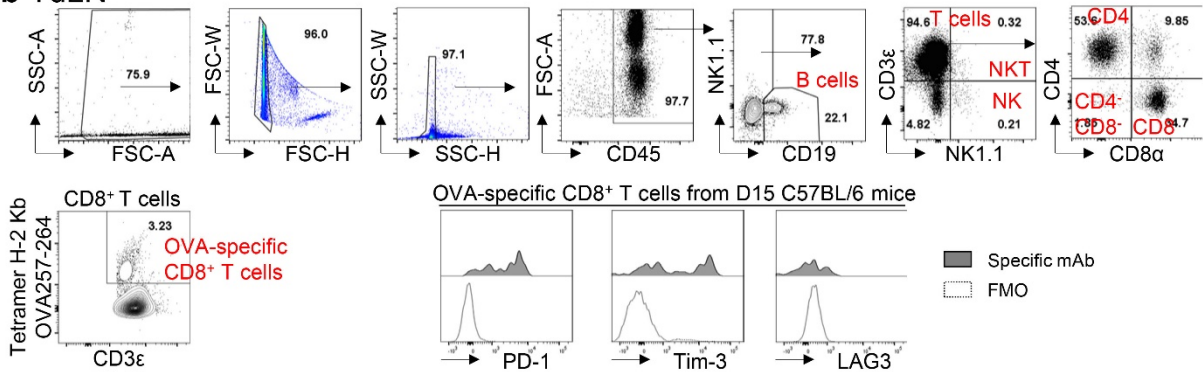

**c TdLN**

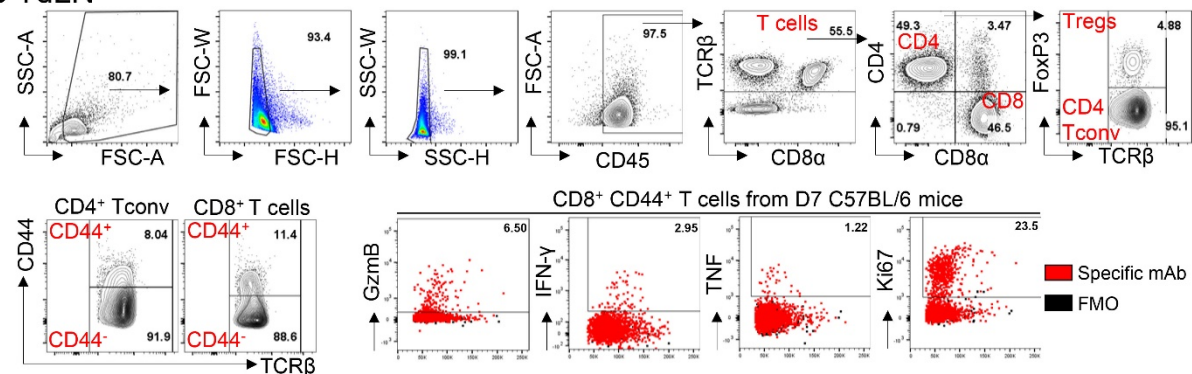

**Supplementary Figure 2.** Gating strategies used to identify myeloid and lymphoid cell populations in TdLNs of *Wt*, *Ifnar1<sup>-/-</sup>*, *Ifngr1<sup>-/-</sup>* and *Xcr1-DTA* mice, used in Fig.2, Fig.5, Fig.7, Supplementary Fig. 6 and Supplementary Fig. 8.

One sample at d7 post-tumor engraftment is shown as representative of all samples. Data are shown for one experiment representative of two. Lineage (CD19, CD3ε and NKp46) exclusion is used in myeloid gating strategy (**a**). This figure also includes: the depletion of Migratory and Resident cDC1 in *Xcr1-DTA* (**a**); the expression of PD-1, Tim-3 and LAG3 in OVA-specific CD8<sup>+</sup> T cells in *Wt* mice at d15 post tumor engraftment (**b**, bottom); and GzmB, IFN-γ, TNF and Ki67 expression in CD44<sup>+</sup> CD8<sup>+</sup> T cells in *Wt* mice at D7 post tumor engraftment after *ex-vivo* SIINFEKL peptide re-stimulation (**c**, bottom).

Supplementary Figure 3

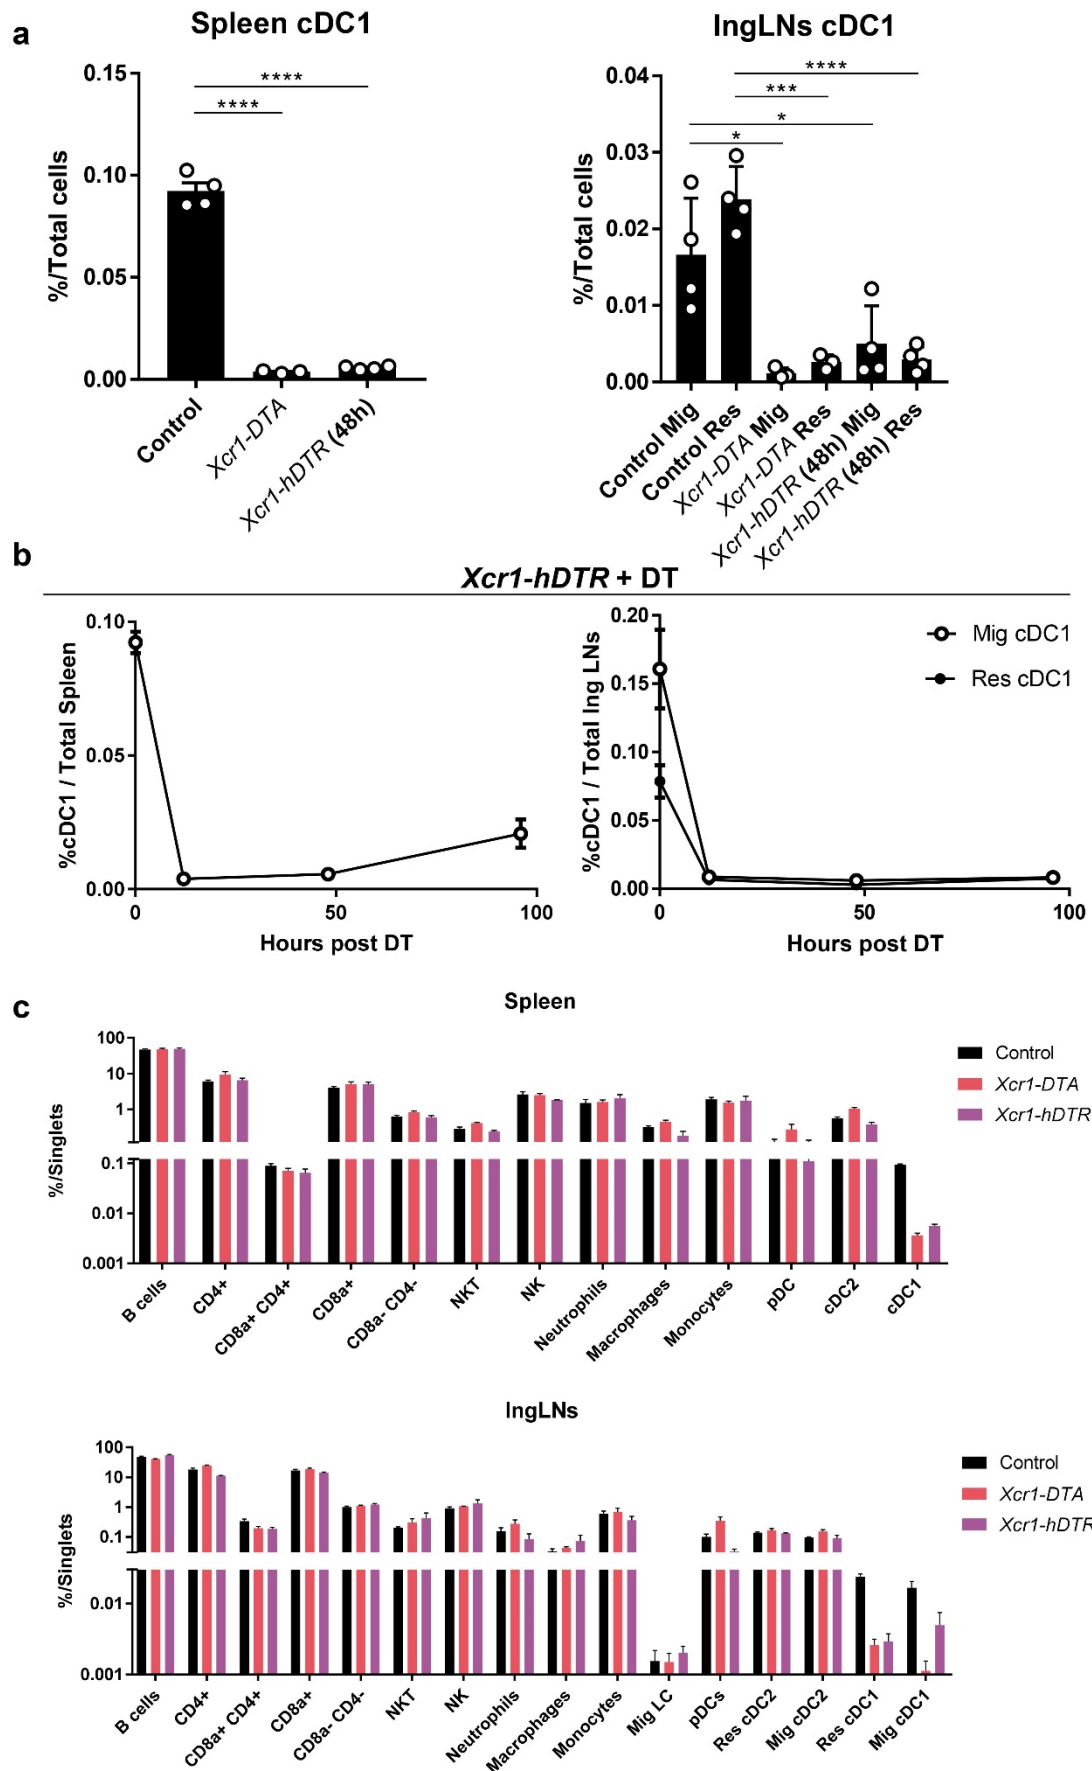

Supplementary Figure 3. Efficient cDC1 depletion in *Xcr1-DTA* and *Xcr1-hDTR* mice.

(a) cDC1 proportion in spleen (left) and IngLNs (right) in *Xcr1-DTA* and *Xcr1-hDTR* mice (48h after DT). Data are shown as one dot per mouse with mean±SEM per group. (b) Kinetics of cDC1 depletion



in spleen (left) and IngLNs (right) after one DT injection in *Xcr1-hDTR* mice. Data are shown as mean±SEM. (c) %/total cells (mean±SEM) for the indicated populations in spleen (top) and IngLNs (bottom) in *Xcr1-DTA*, *Xcr1-hDTR* (48h after DT) and control mice. The data shown are for 3-4 mice per condition from one experiment representative of two independent ones. \*,  $P < 0.05$ ; \*\*,  $P < 0.01$ ; \*\*\*,  $P < 0.001$ ; \*\*\*\*,  $P < 0.0001$  (unpaired *t*-test).

### Supplementary Figure 4.

#### a Tumor

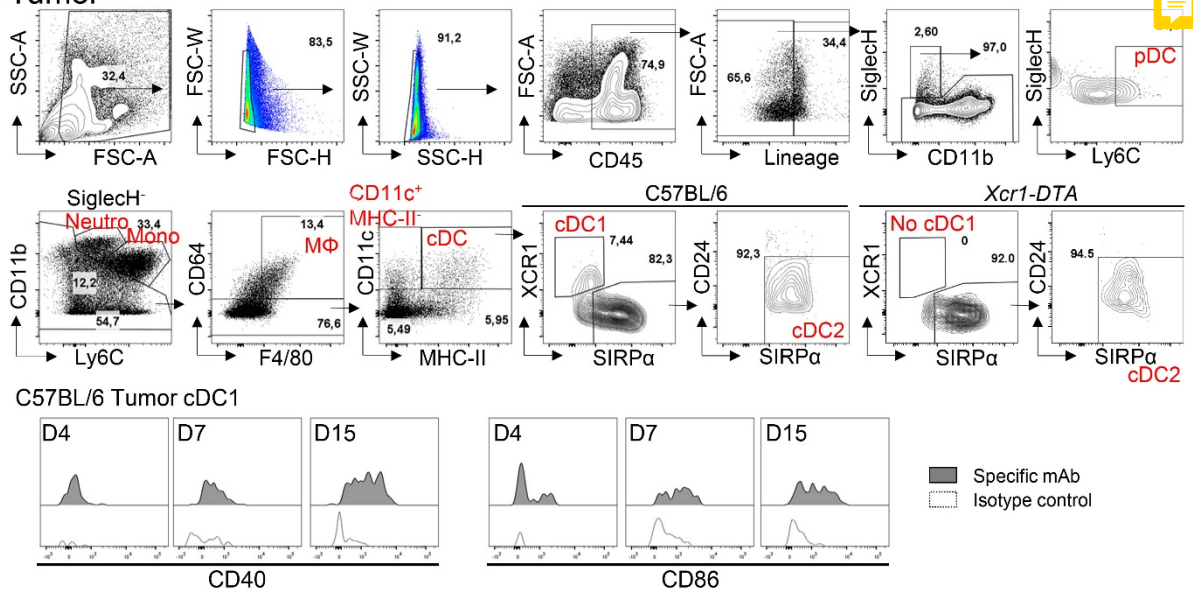

#### b Tumor

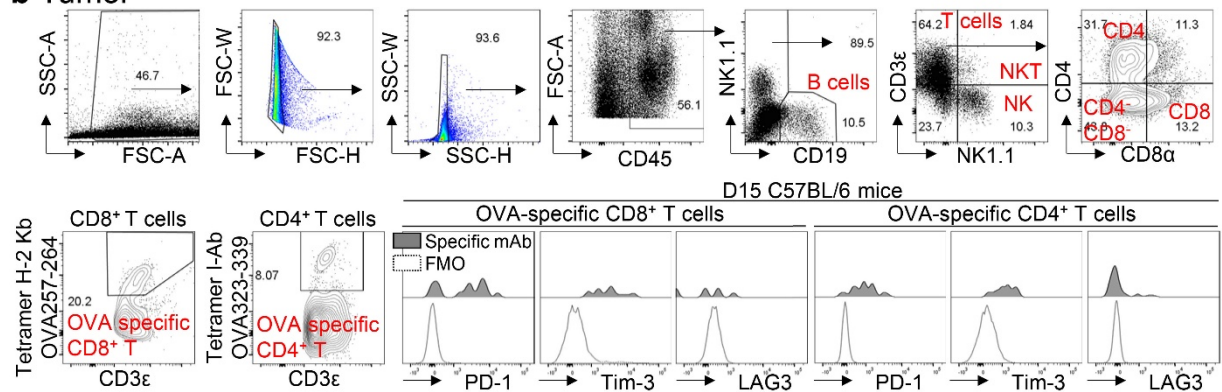

#### c Tumor

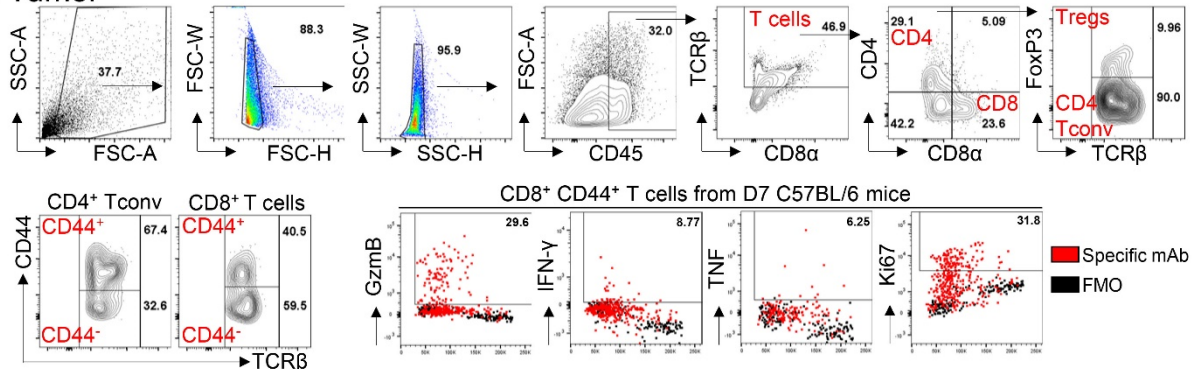

**Supplementary Figure 4.** Gating strategies used to identify myeloid and lymphoid cell populations in tumors of *Wt*, *Ifnar1<sup>-/-</sup>*, *Ifngr1<sup>-/-</sup>* and *Xcr1-DTA* mice, used in Fig.5, Fig.6, Fig.7, Supplementary Fig. 7, Supplementary Fig. 8 and Supplementary Fig. 10.

One sample at d7 post tumor engraftment is shown as representative of all samples. Data are shown for one experiment representative of two. Lineage (CD19, CD3 $\epsilon$  and NKp46) exclusion is used in myeloid gating strategy (a). This figure also includes: the depletion of tumor cDC1 in *Xcr1- $\Delta$ TA* (a, top); the expression of CD40 and CD86 in cDC1 in *Wt* mice at d4, d7 and d15 post engraftment (a, bottom); the expression of PD-1, Tim-3 and LAG3 in OVA-specific CD4 $^{+}$  and CD8 $^{+}$  T cells in *Wt* mice at d15 post tumor engraftment (b, bottom); and GzmB, IFN- $\gamma$ , TNF and Ki67 expression in CD44 $^{+}$  CD8 $^{+}$  T cells in *Wt* mice at d7 post tumor engraftment after *ex-vivo* SIINFEKL peptide re-stimulation (c, bottom).

### Supplementary Figure 5

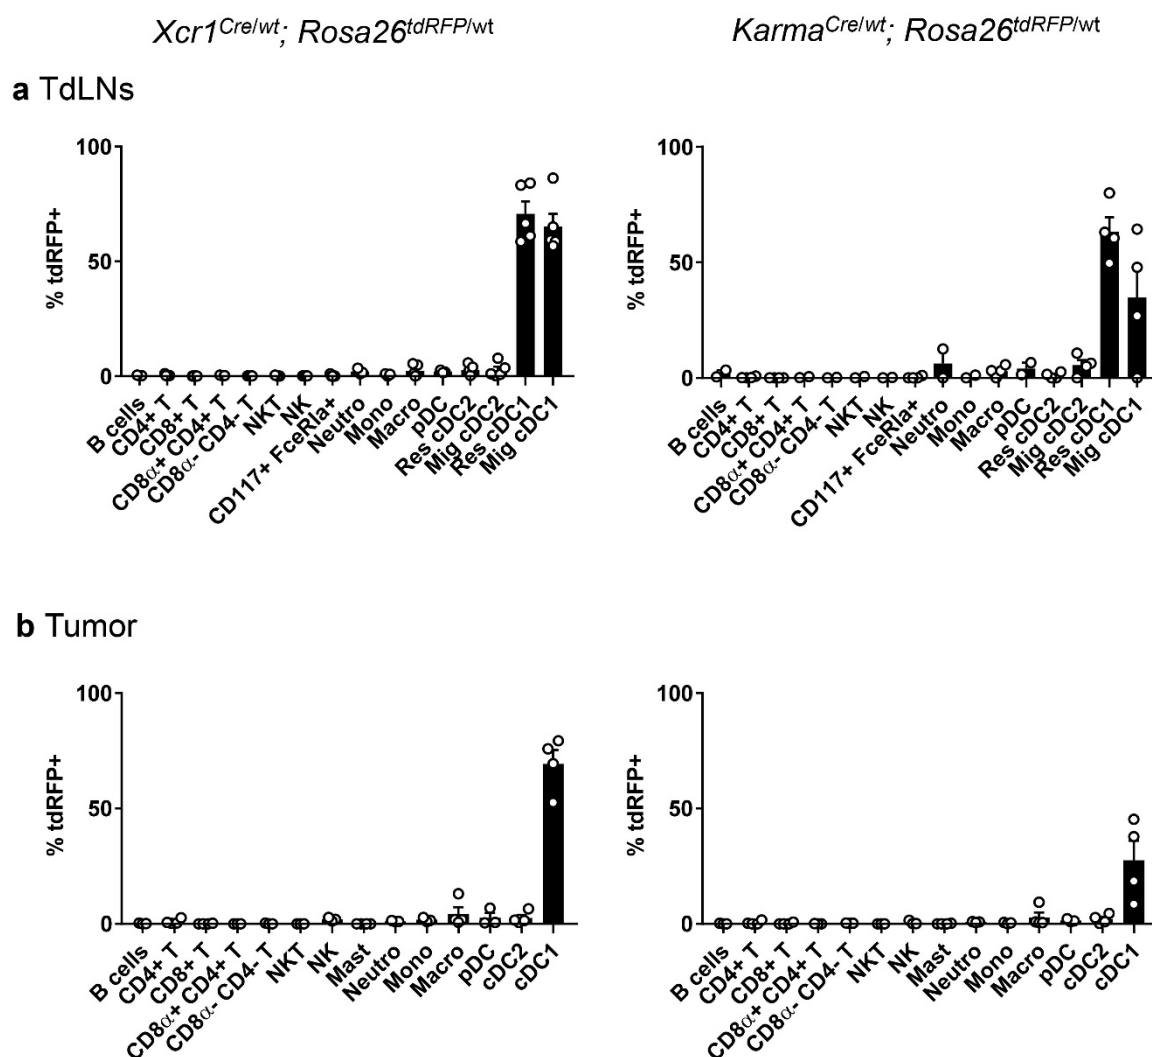

**Supplementary Figure 5.** The *Xcr1<sup>Cre/wt</sup>; Rosa26<sup>tdRFP/wt</sup>* and *Karma<sup>Cre/wt</sup>; Rosa26<sup>tdRFP/wt</sup>* mouse strains allow specific fate mapping of cDC1 in the tumor and TdLNs.

tdRFP expression analysis by different immune cell populations from TdLNs (a) and tumors (b) at d4 post engraftment in *Xcr1<sup>Cre/wt</sup>; Rosa26<sup>tdRFP/wt</sup>* and *Karma<sup>Cre/wt</sup>; Rosa26<sup>tdRFP/wt</sup>* mice. The data shown (one dot per mouse with mean $\pm$ SEM per group) are from two independent experiments pooled together.



### Supplementary Figure 6

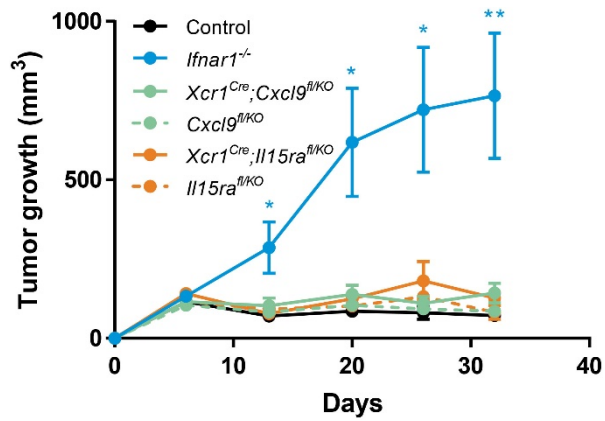

**Supplementary Figure 6.** CXCL9 production and IL-15 trans-presentation by cDC1 are not necessary for tumor rejection.

Tumor growth (mean±SEM) in *Ifnar1<sup>-/-</sup>* (n=7), *Xcr1<sup>cre</sup>;Cxcl9<sup>fl/KO</sup>* (n=4), *Cxcl9<sup>fl/KO</sup>* (n=6), *Xcr1<sup>cre</sup>;Il15ra<sup>fl/KO</sup>* (n=4) and *Il15ra<sup>fl/KO</sup>* (n=5) and Control (n=6) female mice. One experiment representative of >2 independent ones is shown. \*,  $P < 0.05$ ; \*\*,  $P < 0.01$ ; \*\*\*,  $P < 0.001$  (unpaired *t*-test).

### Supplementary Figure 7

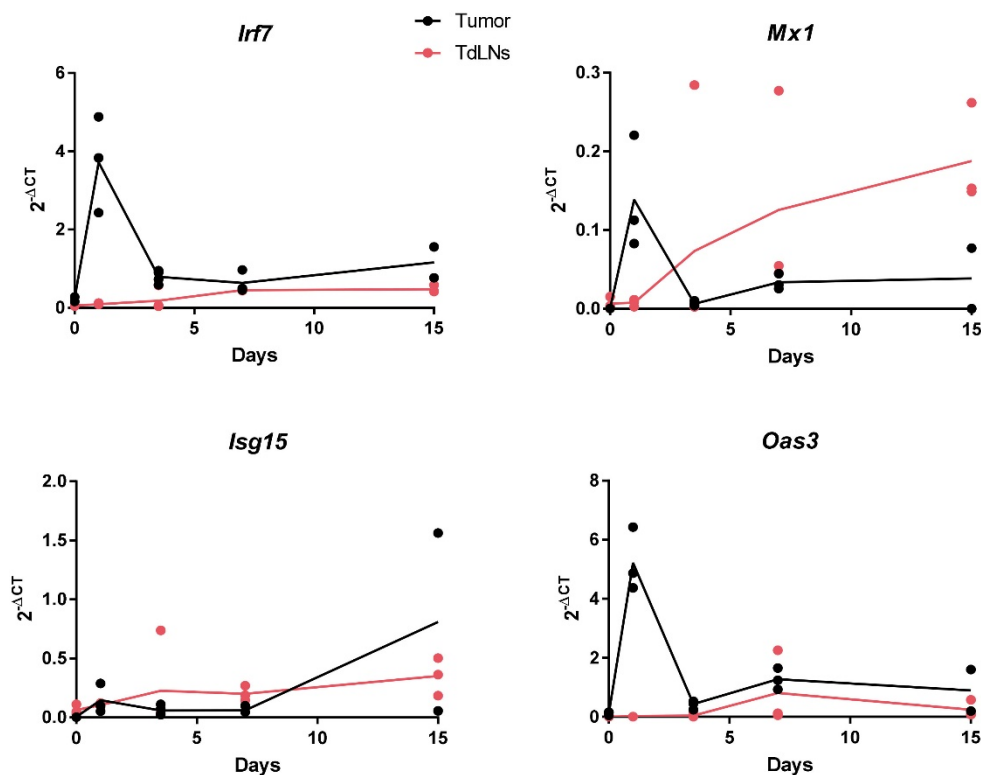

**Supplementary Figure 7.** ISGs are transcribed in tumor and TdLNs.

Expression of the *Irf7*, *Mx1*, *Isg15* and *Oas3* genes overtime in tumor and TdLNs (n=2-4) from *WT* mice.

## Supplementary Figure 8

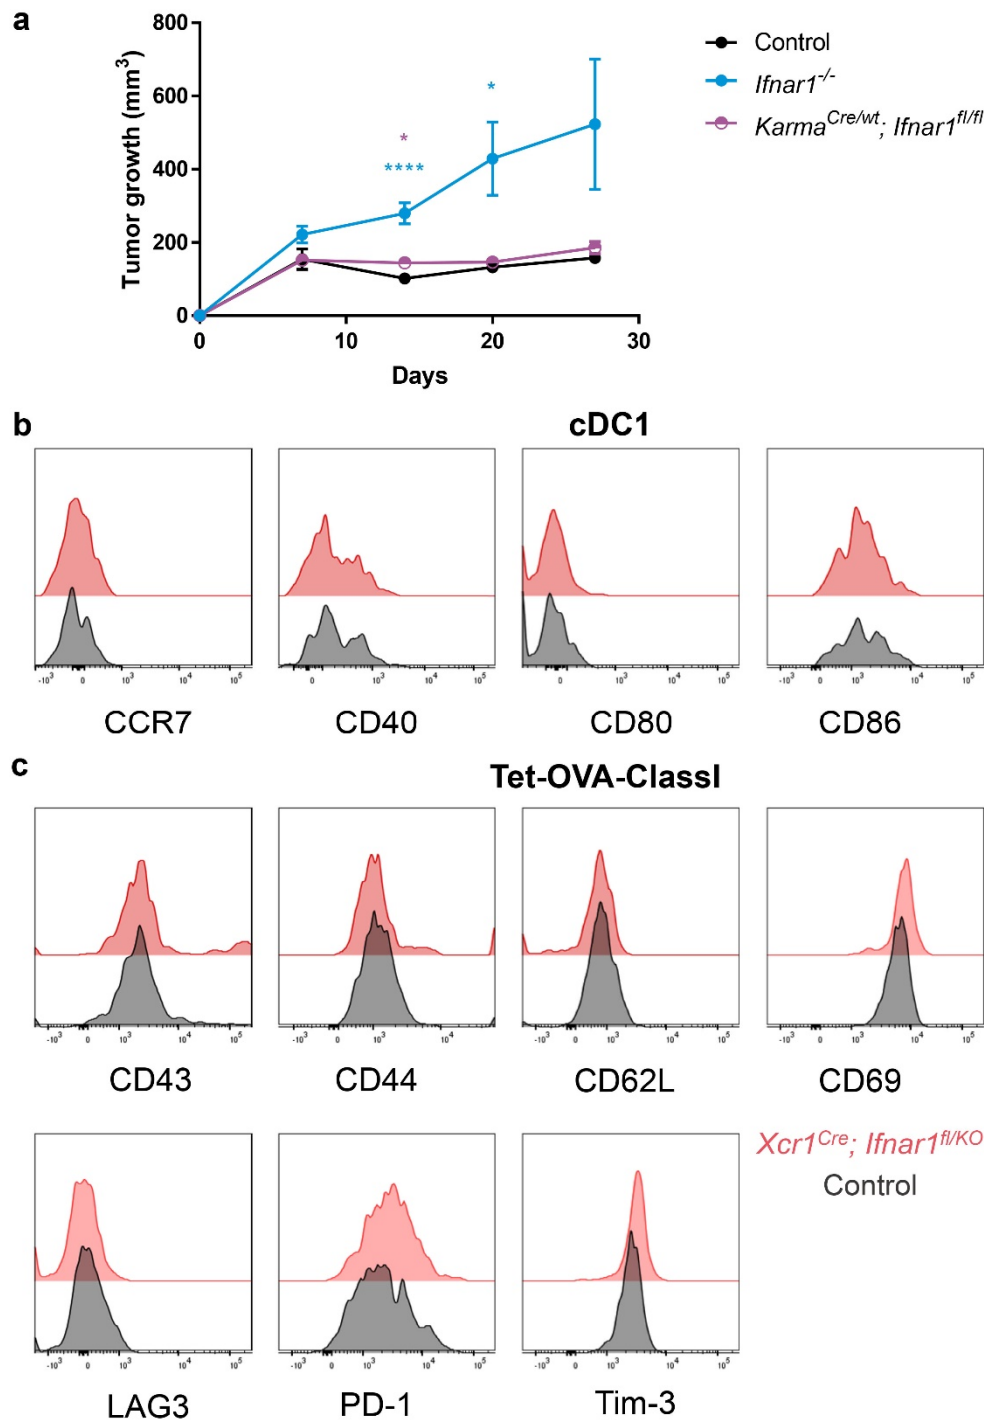

**Supplementary Figure 8.** cDC1 cell-intrinsic responses to IFN-I are dispensable for tumor control. (a) Tumor growth (mean±SEM) in *Ifnar1*<sup>-/-</sup> (n=8), *Karma*<sup>Cre/wt</sup>; *Ifnar1*<sup>fl/fl</sup> (n=8) and control (n=7) female mice. One experiment representative of two independent ones is shown. \*,  $P < 0.05$ ; \*\*,  $P < 0.01$ ; \*\*\*,  $P < 0.001$ ; \*\*\*\*,  $P < 0.0001$  (unpaired *t*-test). (b-c) Expression of activation markers on tumor-infiltrating cDC1 (b) and Ag-specific CD8<sup>+</sup> T cells (c) at d25 post-engraftment in *Xcr1*<sup>cre</sup>; *Ifnar1*<sup>fl/KO</sup> and control mice.

## Supplementary Figure 9

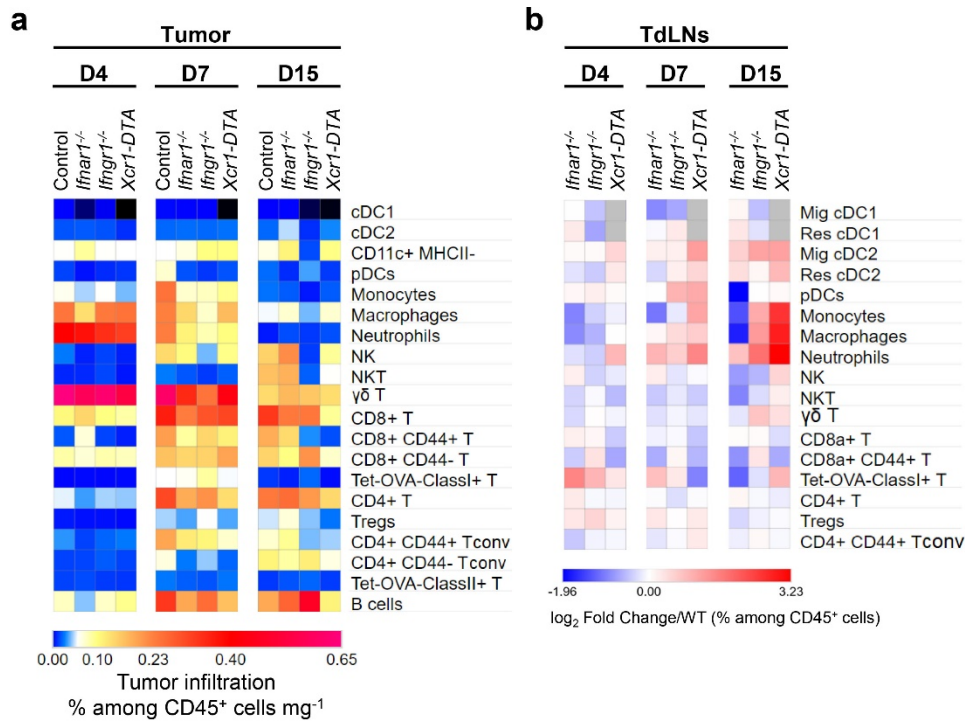

**Supplementary Figure 9.** cDC1 and IFN signaling shape the tumor immune landscape.

Heatmaps representing the global immune landscapes in the tumors (**a**) and TdLNs (**a**) at d4, d7 and d15 after engraftment in *Ifnar1*<sup>-/-</sup>, *Ifngr1*<sup>-/-</sup>, *Xcr1-DTA* and control mice (n=3-6 mice per group). The data are shown as (mean % Population/CD45<sup>+</sup>/mg) (**a**) and as log<sub>2</sub> Fold Changes calculated as the ratio of % Population/CD45<sup>+</sup> from mutant animals to WT (**b**). The data shown are from two independent experiments pooled together.

## Supplementary Figure 10

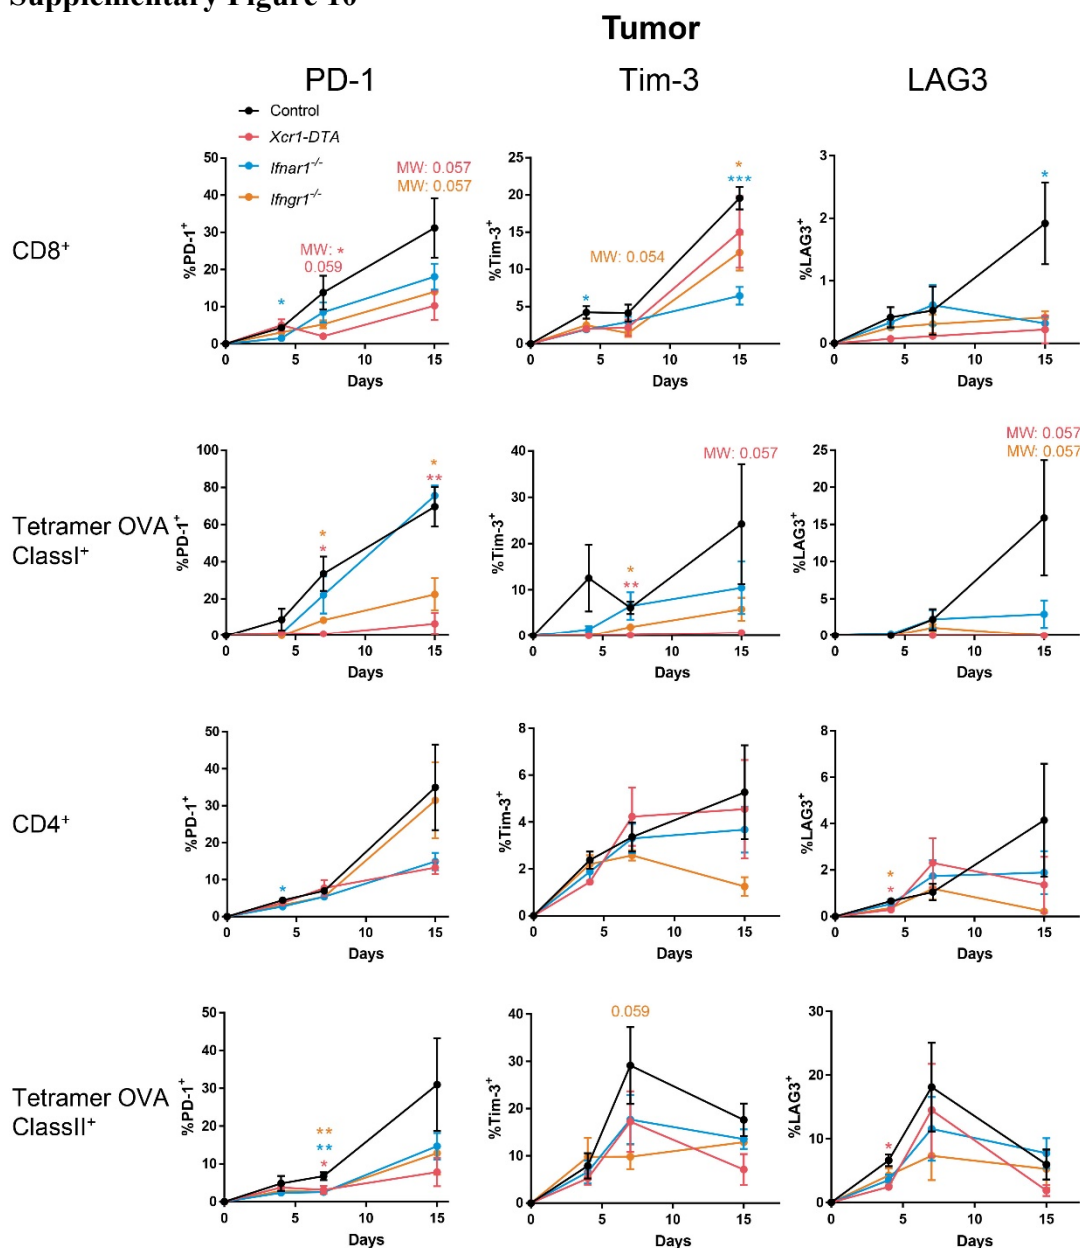

**Supplementary Figure 10.** cDC1, IFN-I and IFN- $\gamma$  signaling are necessary for CD4<sup>+</sup> and CD8<sup>+</sup> T cell terminal activation in the TME.

Frequencies of PD-1<sup>+</sup>; Tim-3<sup>+</sup> and LAG3<sup>+</sup> among CD8<sup>+</sup>, Ag-specific CD8<sup>+</sup>, CD4<sup>+</sup> and Ag-specific CD4<sup>+</sup> T cells at d4, d7 and d15 in the tumors from control, *Ifnar1*<sup>-/-</sup>, *Ifngr1*<sup>-/-</sup> and *Xcr1-DTA* mice.

The data shown (mean $\pm$ SEM) are from two independent experiments pooled together (n=3-6 mice per group). ns, not significant ( $P>0.05$ ); \*,  $P<0.05$ ; \*\*,  $P<0.01$ ; \*\*\*,  $P<0.001$ ; (unpaired *t*-test or nonparametric Mann-Whitney *U*-test [MW] when specified).

## Supplementary Figure 11

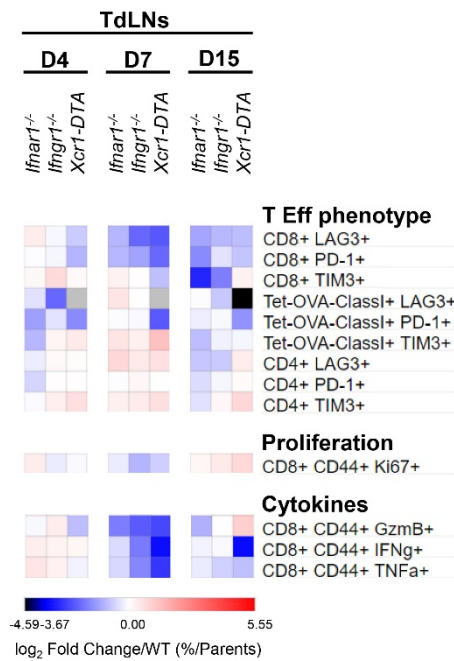

## Supplementary Figure 11. cDC1, IFN-I and IFN- $\gamma$

signaling shape TdLN immune composition, immune population activation states and effector functions.

Heatmap representing effector T cell phenotype, CTL proliferation and CTL cytokine production. For cytokine production, cell suspensions were restimulated *ex vivo* with SIINFEKL peptide. The data are shown as log<sub>2</sub> Fold Changes of the mean %Population/Parent population of mutant animals compared to their WT counterparts (n=3-6 mice per group). The data shown are from two independent experiments pooled together.

## Supplementary Figure 12

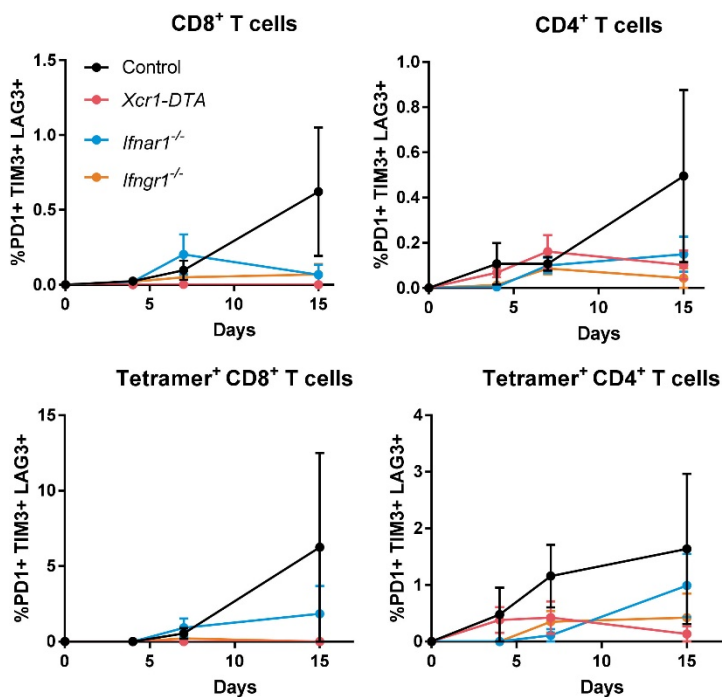

## Supplementary Figure 12. “Exhausted-like” T cells are rare in tumors.

Kinetic analysis of the percent of tumor-infiltrating cells co-expressing PD-1, Tim-3 and LAG3 among CD8<sup>+</sup>, Ag-specific CD8<sup>+</sup>, CD4<sup>+</sup> and Ag-specific CD4<sup>+</sup> T cells at d4, d7 and d15 in *Ifnar1<sup>-/-</sup>*, *Ifngr1<sup>-/-</sup>* and *Xcr1-DTA* and in control mice. The data shown (mean±SEM) are from two independent experiments pooled together, each with 3-6 mice per experimental group.

# Supplementary Figure 13

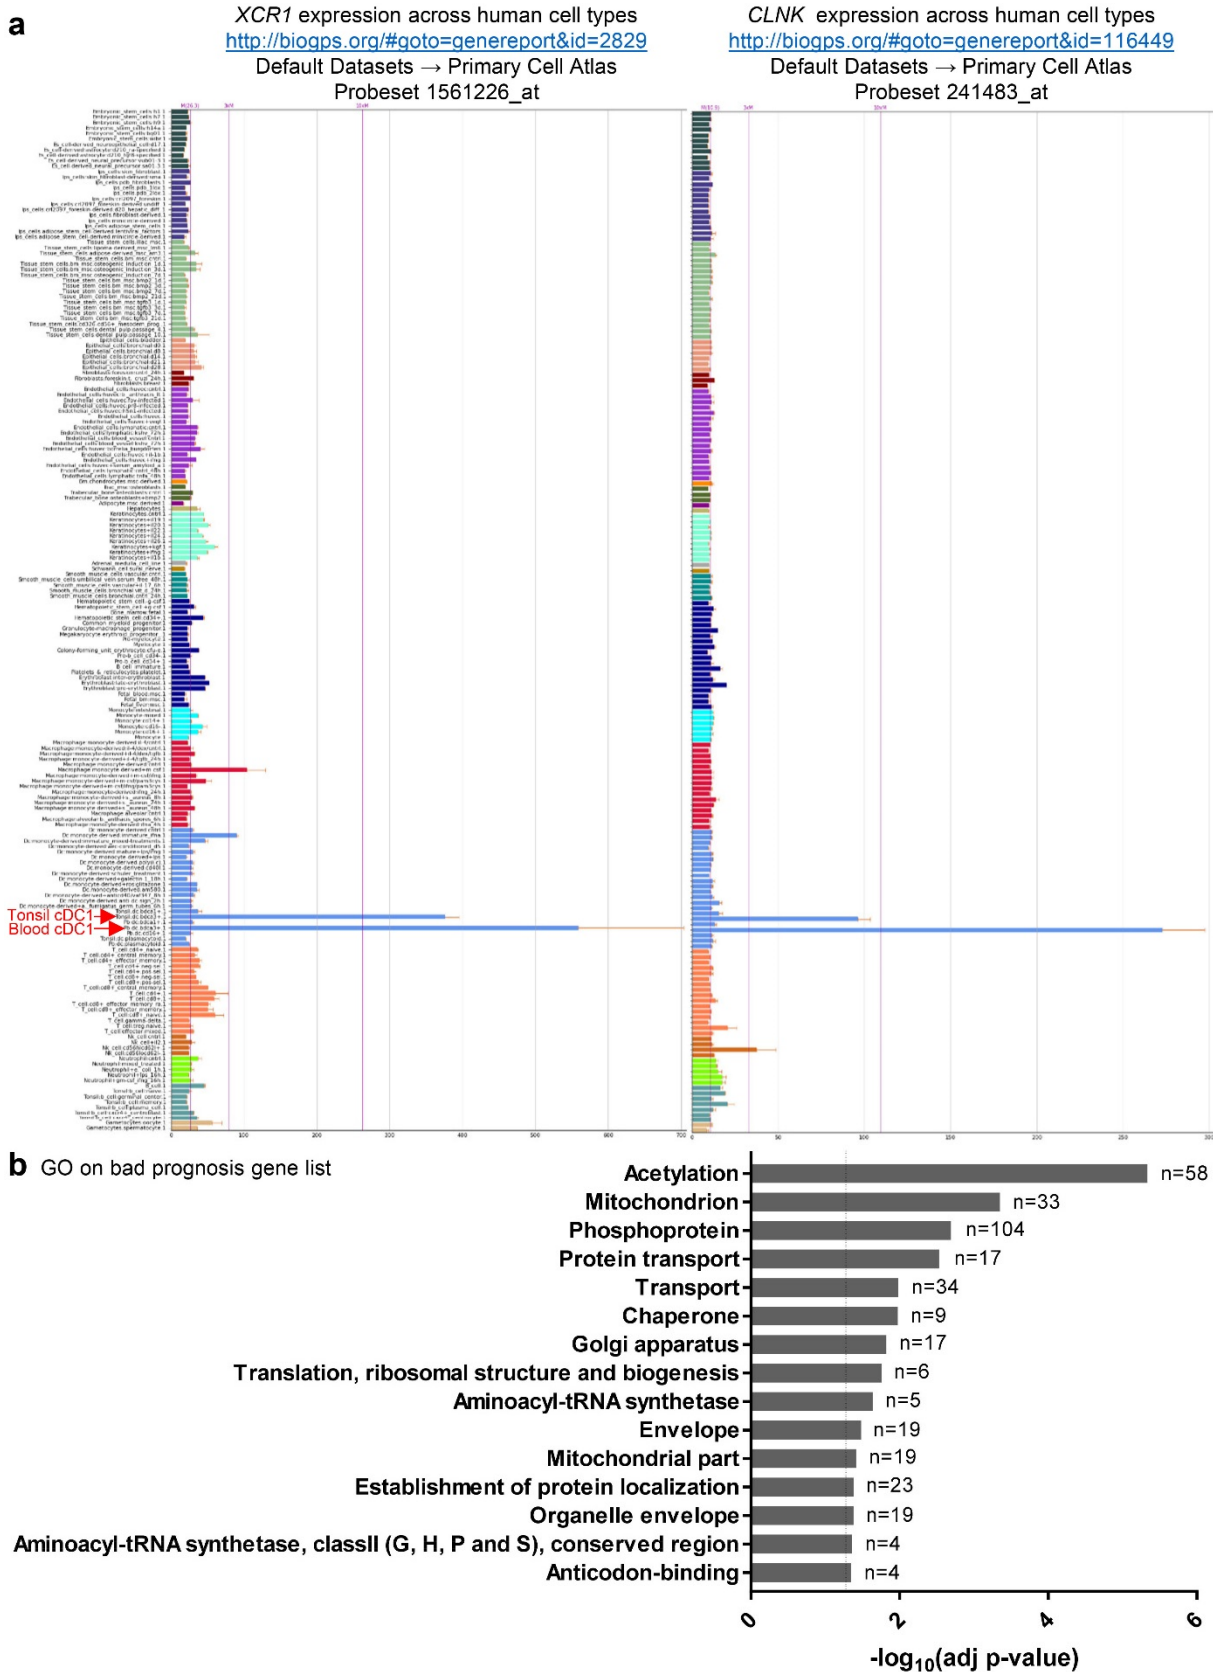

**Supplementary Figure 13.** Expression pattern of cDC1 signature genes across human cell types, and gene ontology analysis of genes associated with a bad prognosis in human breast cancer patients.



(a) Expression pattern of the *XCR1* and *CLNK* genes across a variety of human cell types. (b) Gene Ontology of the breast cancer bad prognosis gene set showing its association with an active metabolism. The data source used and the type of analysis performed are the same as depicted in the legend of Figure 8.

### Supplementary Figure 14

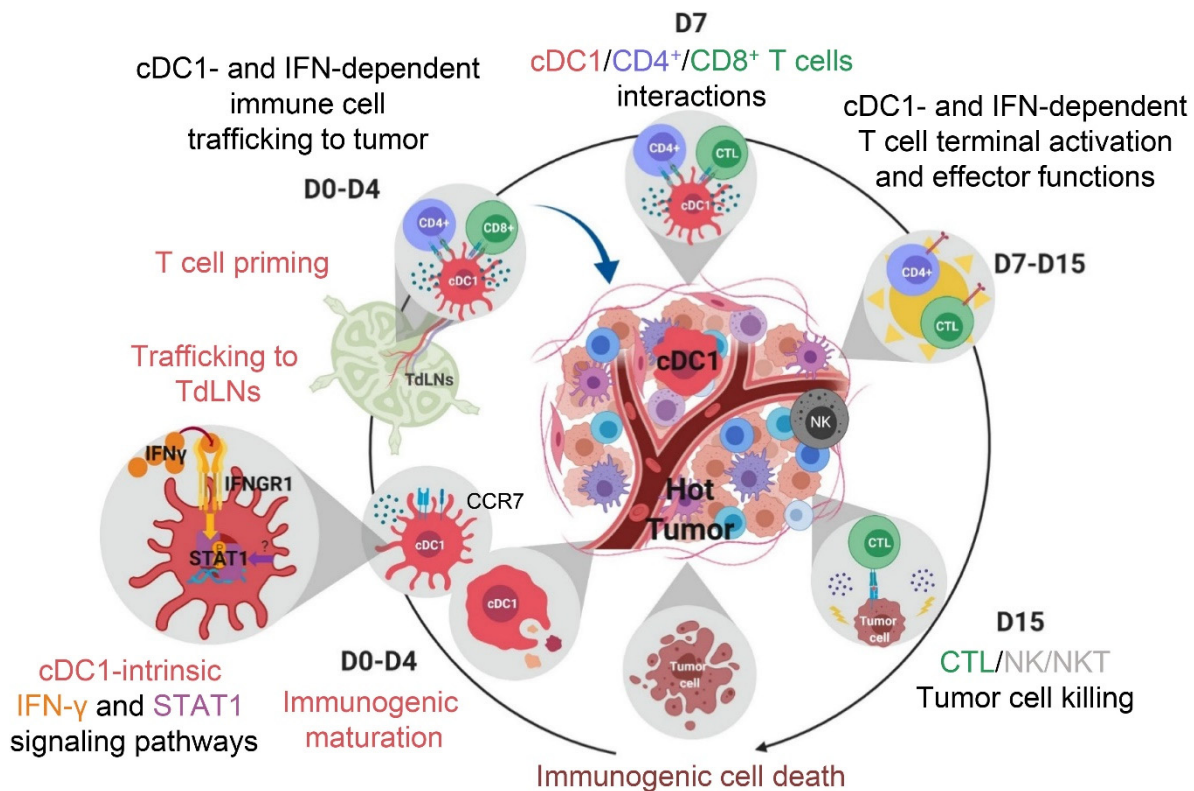

**Supplementary Figure 14.** Proposed model of cDC1 and IFN role in the immunosurveillance against breast cancer.

Within the 4 first days after tumor engraftment, type I IFNs and IFN- $\gamma$  participate in shaping a microenvironment suitable to confer immunogenicity to cDC1 resident of tumors, or in the periphery of tumors. These cDC1 acquire CCR7 expression, which confers them their capacity to migrate into the TdLN. In the TdLN, they may prime both CD4<sup>+</sup> and CD8<sup>+</sup> T cells in type I IFN-independent manner. At day 7 in the TME, cDC1 are seen interacting simultaneously with CD4<sup>+</sup> and tumor-specific CD8<sup>+</sup> T cells, promoting their terminal differentiation and functional responses instrumental for tumor rejection. NK/NKT cells would also participate in eliminating tumor cells.



## Supplementary references

1. Alexandre YO, Ghilas S, Sanchez C, Le Bon A, Crozat K, Dalod M. XCR1+ dendritic cells promote memory CD8+ T cell recall upon secondary infections with *Listeria monocytogenes* or certain viruses. *J Exp Med* 2016; **213**: 75-92.
2. Hao Z, Rajewsky K. Homeostasis of peripheral B cells in the absence of B cell influx from the bone marrow. *J Exp Med* 2001; **194**: 1151-1164.
3. Hogquist KA, Jameson SC, Heath WR, Howard JL, Bevan MJ, Carbone FR. T cell receptor antagonist peptides induce positive selection. *Cell* 1994; **76**: 17-27.
4. Schaefer BC, Schaefer ML, Kappler JW, Marrack P, Kedl RM. Observation of antigen-dependent CD8+ T-cell/ dendritic cell interactions in vivo. *Cell Immunol* 2001; **214**: 110-122.
5. Forster R, Schubel A, Breitfeld D, *et al.* CCR7 coordinates the primary immune response by establishing functional microenvironments in secondary lymphoid organs. *Cell* 1999; **99**: 23-33.
6. Muller U, Steinhoff U, Reis LF, *et al.* Functional role of type I and type II interferons in antiviral defense. *Science* 1994; **264**: 1918-1921.
7. Baranek T, Manh TP, Alexandre Y, *et al.* Differential responses of immune cells to type I interferon contribute to host resistance to viral infection. *Cell Host Microbe* 2012; **12**: 571-584.
8. Huang S, Hendriks W, Althage A, *et al.* Immune response in mice that lack the interferon-gamma receptor. *Science* 1993; **259**: 1742-1745.
9. Magram J, Connaughton SE, Warriar RR, *et al.* IL-12-deficient mice are defective in IFN gamma production and type 1 cytokine responses. *Immunity* 1996; **4**: 471-481.
10. Lodolce JP, Boone DL, Chai S, *et al.* IL-15 receptor maintains lymphoid homeostasis by supporting lymphocyte homing and proliferation. *Immunity* 1998; **9**: 669-676.
11. Tomasello E, Naciri K, Chelbi R, *et al.* Molecular dissection of plasmacytoid dendritic cell activation in vivo during a viral infection. *EMBO J* 2018; **37**.
12. Crozat K, Guiton R, Contreras V, *et al.* The XC chemokine receptor 1 is a conserved selective marker of mammalian cells homologous to mouse CD8alpha+ dendritic cells. *J Exp Med* 2010; **207**: 1283-1292.
13. Dorner BG, Dorner MB, Zhou X, *et al.* Selective expression of the chemokine receptor XCR1 on cross-presenting dendritic cells determines cooperation with CD8+ T cells. *Immunity* 2009; **31**: 823-833.
14. Mattiuz R, Wohn C, Ghilas S, *et al.* Novel Cre-Expressing Mouse Strains Permitting to Selectively Track and Edit Type 1 Conventional Dendritic Cells Facilitate Disentangling Their Complexity in vivo. *Front Immunol* 2018; **9**: 2805.
15. Le Bon A, Durand V, Kamphuis E, *et al.* Direct stimulation of T cells by type I IFN enhances the CD8+ T cell response during cross-priming. *J Immunol* 2006; **176**: 4682-4689.
16. Kamphuis E, Junt T, Waibler Z, Forster R, Kalinke U. Type I interferons directly regulate lymphocyte recirculation and cause transient blood lymphopenia. *Blood* 2006; **108**: 3253-3261.
17. Mortier E, Advincula R, Kim L, *et al.* Macrophage- and dendritic-cell-derived interleukin-15 receptor alpha supports homeostasis of distinct CD8+ T cell subsets. *Immunity* 2009; **31**: 811-822.
18. Voehringer D, Liang HE, Locksley RM. Homeostasis and effector function of lymphopenia-induced "memory-like" T cells in constitutively T cell-depleted mice. *J Immunol* 2008; **180**: 4742-4753.
19. Buch T, Heppner FL, Tertilt C, *et al.* A Cre-inducible diphtheria toxin receptor mediates cell lineage ablation after toxin administration. *Nat Methods* 2005; **2**: 419-426.
20. Luche H, Weber O, Nageswara Rao T, Blum C, Fehling HJ. Faithful activation of an extra-bright red fluorescent protein in "knock-in" Cre-reporter mice ideally suited for lineage tracing studies. *Eur J Immunol* 2007; **37**: 43-53.

21. Onami TM, Harrington LE, Williams MA, *et al.* Dynamic regulation of T cell immunity by CD43. *J Immunol* 2002; **168**: 6022-6031.
